# Supplementary material for: Repertoire-scale measures of antigen binding
Source: PubMed Central journal article supplement (PMC9407674; doi:10.1073/pnas.2203505119), 2022-08-15
Supplement: pnas.2203505119.sapp.pdf [file pnas.2203505119.sapp.pdf]

# Supplementary Materials, Repertoire-Scale Measures of Antigen Binding

**Authors:** Rohit Arora, PhD<sup>1†</sup> and Ramy Arnaout, MD, DPhil<sup>1,2\*</sup>

**Affiliations:**

5 <sup>1</sup>Division of Clinical Pathology, Department of Pathology, Beth Israel Deaconess Medical Center, Boston, MA 02215.

<sup>2</sup>Division of Clinical Informatics, Department of Medicine, Beth Israel Deaconess Medical Center, Boston, MA 02215.

<sup>†</sup>Present address: Iktos Inc. 50 Milk Street, Floor 16, Boston, MA, 02109

10

\*Correspondence to: [rarnaout@bidmc.harvard.edu](mailto:rarnaout@bidmc.harvard.edu)

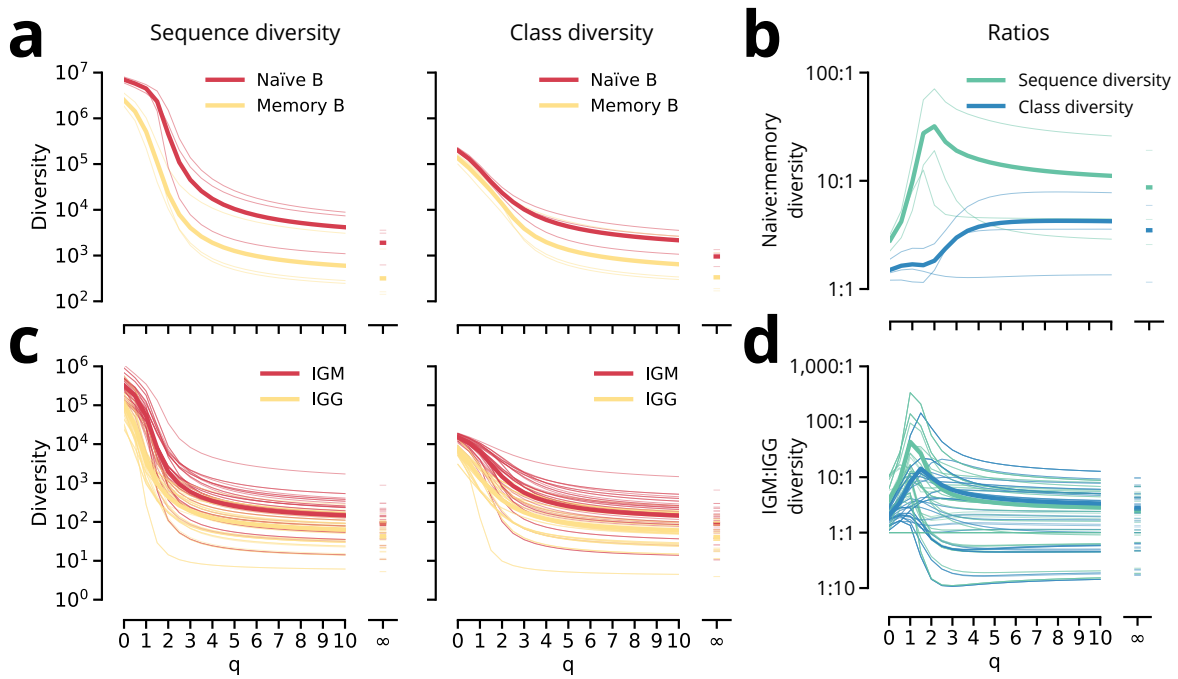

### Supplementary Figure Legend

#### Figure S1. Sequence vs. class diversity of naive vs. memory and IGM vs. IGG repertoires.

- 15 (a) Sequence vs. class diversity for exceptionally deeply sequenced naive vs. memory repertoires from DNA, and (b) the ratio of naive:memory diversity, as a function of  $q$  (see description of Equation 1 in the main text). Each thin line corresponds to a repertoire from a single individual. Each thick line is the average. (c)-(d) Analogous for IGM and IGG.
